# Supplementary material for: Profiling of circulating tumor DNA in plasma of non‐small cell lung cancer patients, monitoring of epidermal growth factor receptor p.T790M mutated allelic fraction using beads, emulsion, amplification, and magnetics companion assay and evaluation in future application in mimicking circulating tumor cells
Source: PubMed Central journal article supplement (PMC6866744; doi:10.1002/cam4.2244), 2019-05-21

# Supplementary Figure 1

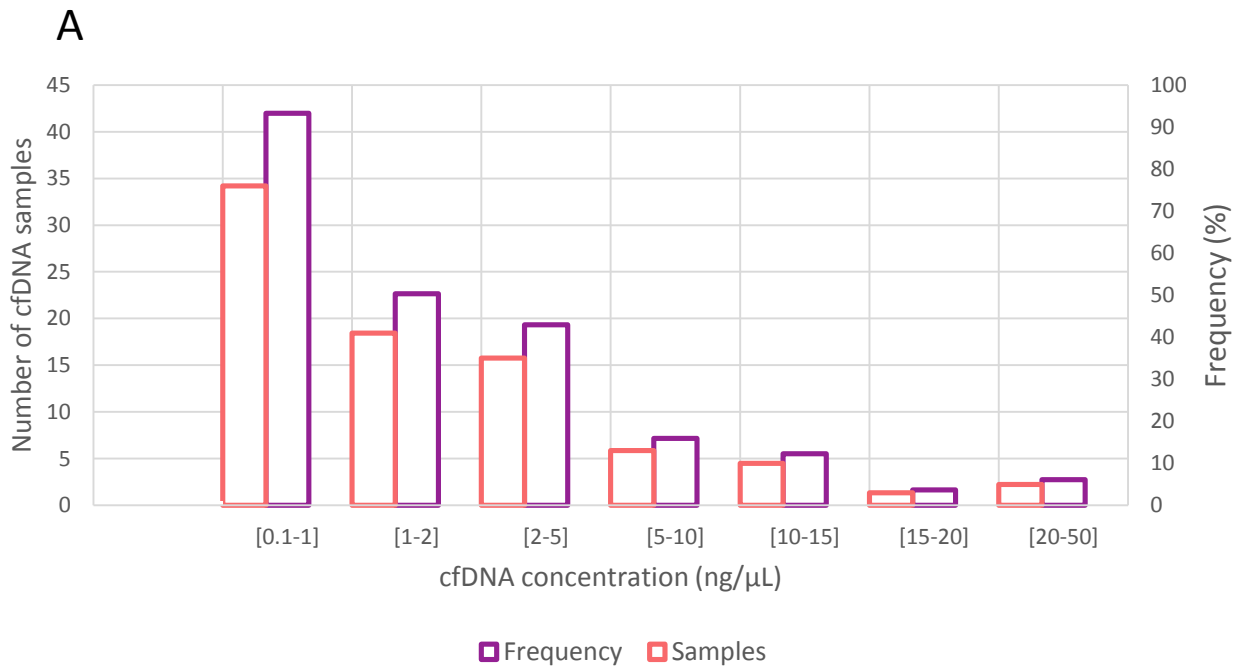

## Supplementary Figure 2

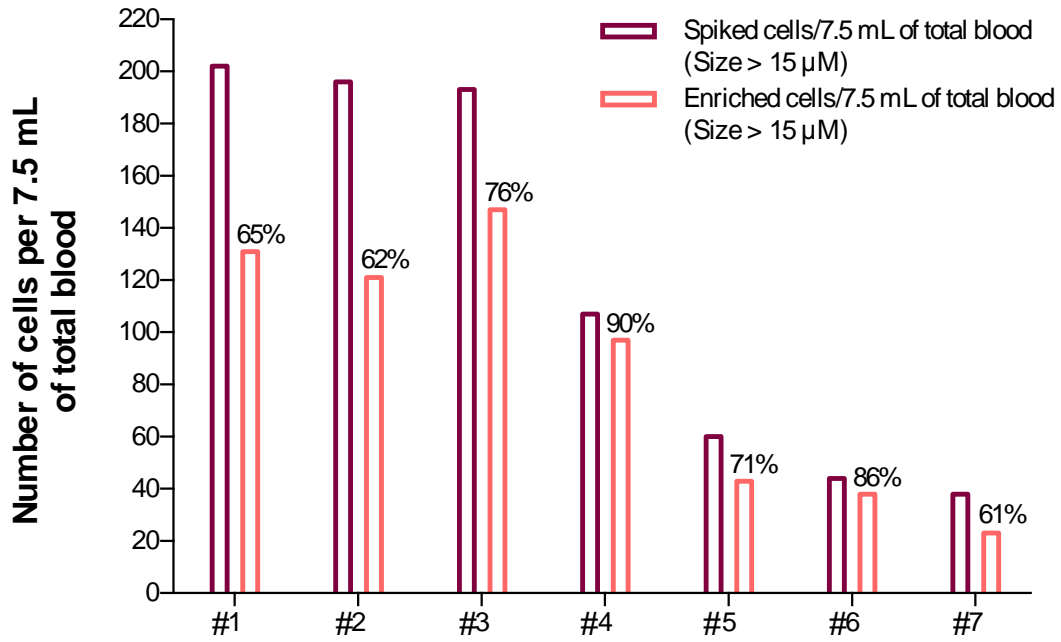

Supplement: CAM4-8-3685-s001.pdf [file CAM4-8-3685-s001.pdf]
